# Supplementary material for: Multiple strategies to greatly enhance the photovoltaic characteristics of BiFeO3-based films
Source: Royal Society of Chemistry journal article supplement (doi:10.1039/d4qi00972j), 2024-01-01
Supplement: d4qi00972j1.pdf [file d4qi00972j1.pdf]

## Supporting Information

# Multiple Strategies to Greatly Enhance the Photovoltaic Characteristics of BiFeO<sub>3</sub>-based Films

Zehao Sun,<sup>1</sup> Jie Wei,<sup>1,\*</sup> Shigeng Song,<sup>2</sup> Minchuan Xiahou,<sup>1</sup> Ao Cao,<sup>1</sup> Junlong Zhang,<sup>1</sup> Youxin Yuanfeng,<sup>1</sup> Guogang Chen,<sup>1</sup> Yongqiang Chen<sup>3</sup>

<sup>1</sup> *Electronic Materials Research Laboratory, Key Laboratory of Ministry of Education & Shaanxi Engineering Research Center of Advanced Energy Materials and Devices, School of Electronic Science and Engineering, Xi'an Jiaotong University, Xi'an 710049, P. R. China*

<sup>2</sup> *Institute of Thin Films, Sensors and Imaging, University of the West of Scotland, SUPA Paisley PA1 2BE, Scotland, UK*

<sup>3</sup> *School of Material Science and Engineering, Zhengzhou University, Henan 450001, China*

**\*Corresponding Author:**

Jie Wei, E-mail address: [weij2008@xjtu.edu.cn](mailto:weij2008@xjtu.edu.cn) ; [jiewei2013wj@gmail.com](mailto:jiewei2013wj@gmail.com)

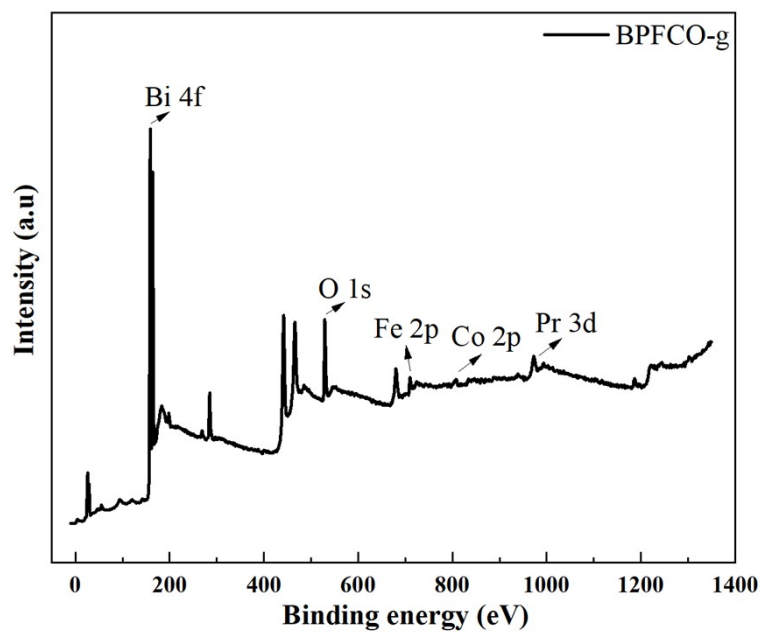

**Figure S1.** XPS survey spectra analysis of gradient doped sample BPFfCO-g

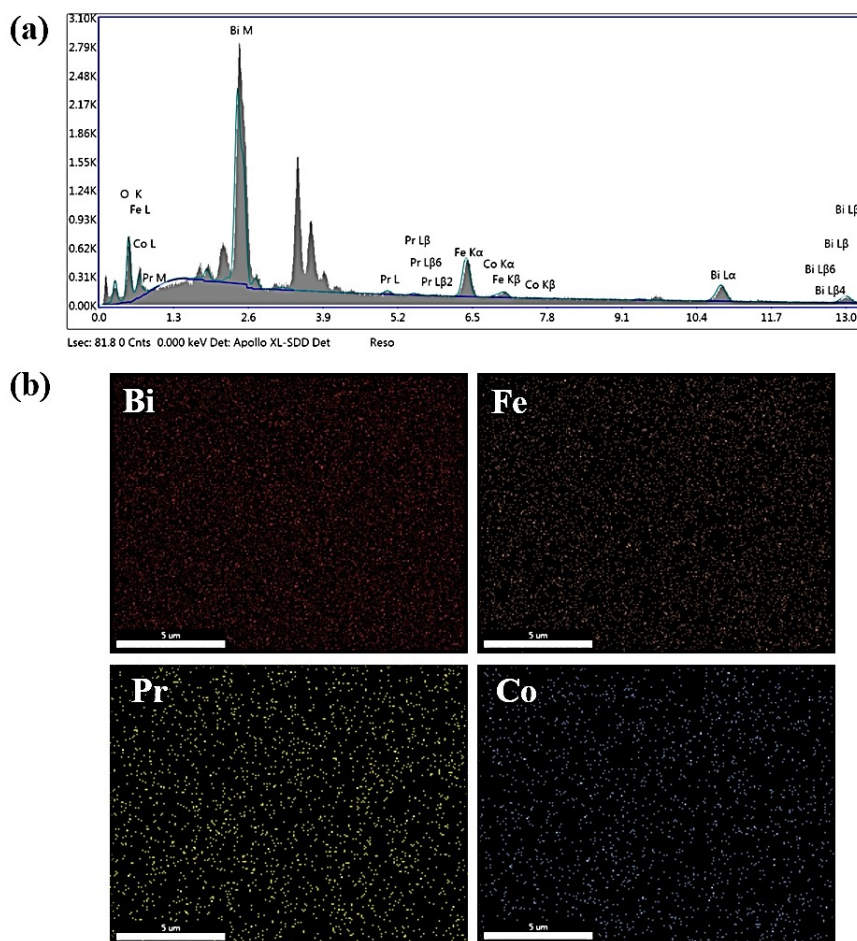

**Figure S2.** (a) EDS spectrum and (b) element Mapping analysis of gradient doped sample BPFfCO-g

As shown in Fig. S1, all the element peaks of Bi4f, O1s, Fe2p, Co2p and Pr3d can be clearly observed in the sample of BPF<sub>CO</sub>-g. As shown in Fig. S2, both EDS spectrum and element mapping analysis clearly confirm that the elements of Co and Pr are indeed present in the sample of BPF<sub>CO</sub>-g.

All in all, XPS survey spectra and EDS mapping analysis clearly confirm that the elements of Co and Pr are indeed present in the doped samples.

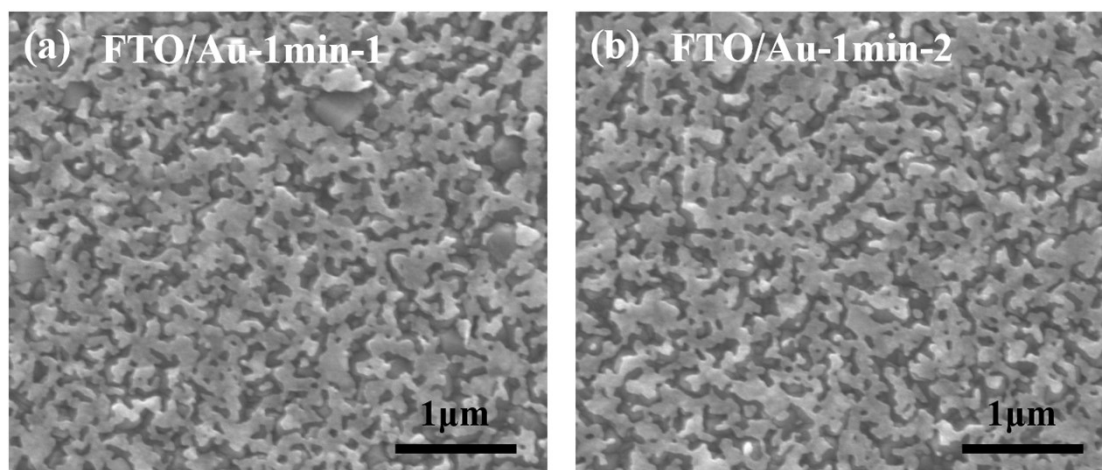

**Figure S3.** SEM images of (a) first sample of FTO/Au-1mins and (b) second sample of FTO/Au-1mins.

As shown in Fig. S3, SEM images show that the microscopic morphologies of the two samples “FTO/Au-1mins” were not significantly different, which suggests that “the Au on the surface of each sample is the almost same, because it undergoes the same procedure”.

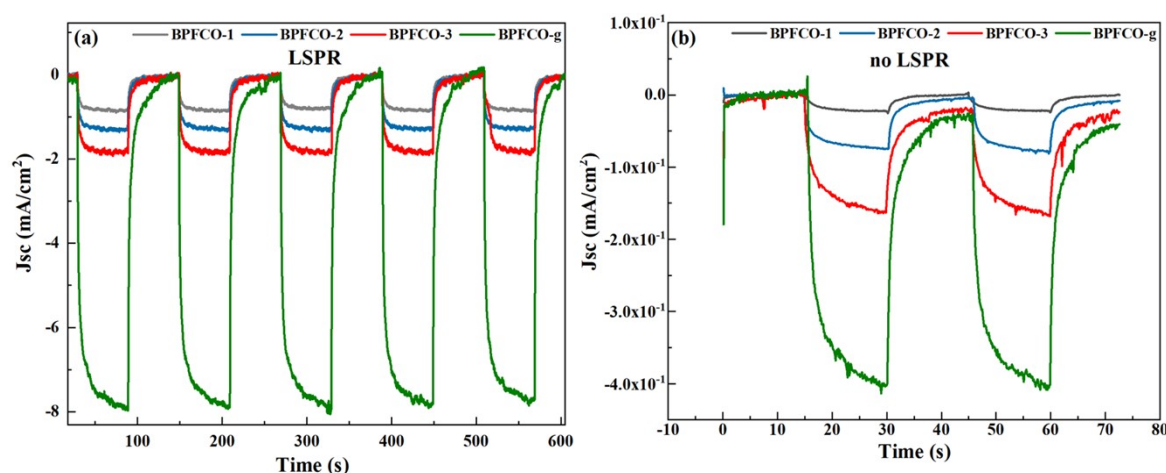

**Figure S4.** Short-circuit current density of four samples (a) with LSPR effect and (b) without LSPR effect

As shown in Figure S4 and Table 4, the short-circuit current density ( $J_{sc}$ ) of four samples (BPFCO-1, BPFCO-2, BPFCO-3, BPFCO-g) with and without LSPR effect is compared. Obviously,  $J_{sc}$  of four samples with LSPR effect is much larger than that without Au nanoparticles, which is evidence to support the LSPR effect of the Au nanoparticles.

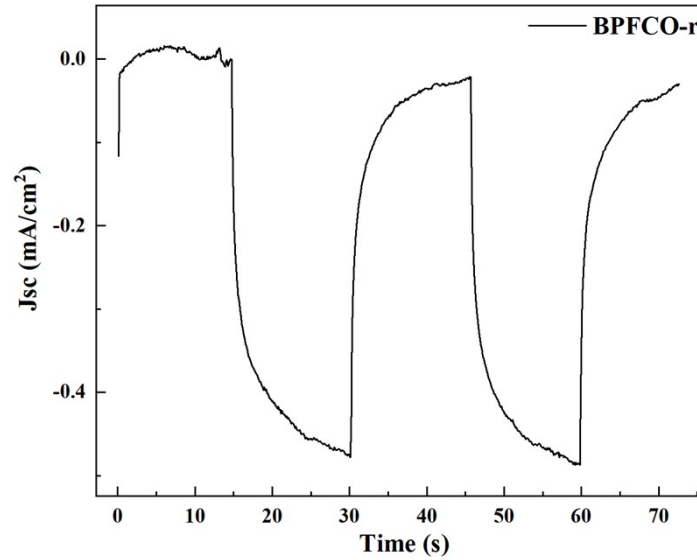

**Figure S5.** Short-circuit current density of reverse gradient doped sample BPFCO-r

**Table S1** Photovoltaic parameters of BPFCO-x (x=1,2,3,g,r) films

|                         | BPFCO-1                | BPFCO-2                | BPFCO-3                | BPFCO-g              | BPFCO-r                |
|-------------------------|------------------------|------------------------|------------------------|----------------------|------------------------|
| $J_{sc}(\text{Au-NPs})$ | 0.8 mA/cm <sup>2</sup> | 1.3 mA/cm <sup>2</sup> | 1.8 mA/cm <sup>2</sup> | 8 mA/cm <sup>2</sup> | 0.4 mA/cm <sup>2</sup> |

The reverse gradient doped sample of BPFCO-r (BPFCO-3/BPFCO-2/BPFCO-1/Au-NPs/FTO) was also constructed. In this sample, the two built-in electric field  $E_{bi-gv}$  and  $E_{flex}$  have the opposite direction. In this way, the two electric fields are cancelling each other out, rather than acting in synergy. Consequently, the short-circuit current density should be very low. As shown in Fig. S5 and Table S1, its short-circuit current density was 0.4 mA/cm<sup>2</sup>, which is even lower than that of the conventional doped sample BPFCO-1. The reason is that the reverse gradient doping causes the two built-in electric

field to cancel out each other, weakening the separation of photo generated carriers, and thus reducing its short-circuit current density.

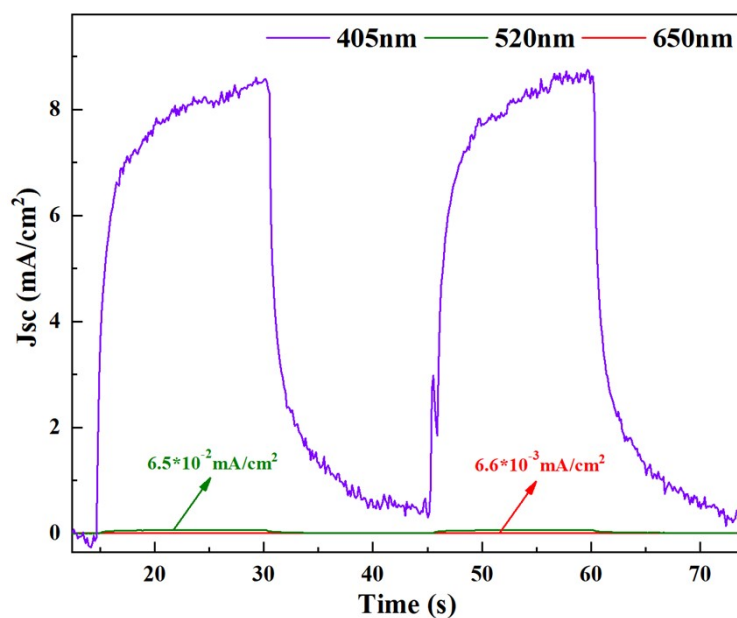

**Figure S6.** *Jsc-T curves of BPFCO-g under three different wavelengths*

**Table S3** *Short circuit current densities of BPFCO-g under three different wavelengths*

| Wavelength (nm)           | 405 | 520                  | 650                  |
|---------------------------|-----|----------------------|----------------------|
| Jsc (mA/cm <sup>2</sup> ) | 8   | $6.5 \times 10^{-2}$ | $6.6 \times 10^{-3}$ |

Figure S6 shows the short-circuit current densities of the gradient doped sample film BPFCO-g under irradiation of 405nm, 520nm, and 650nm light sources, respectively. As can be clearly seen from Figure S6 and Table S3, BPFCO-g film has the highest short-circuit current density under irradiation of 405nm light source. However, its photocurrent density is poorly small under irradiation of light at wavelengths higher than 500 nm.

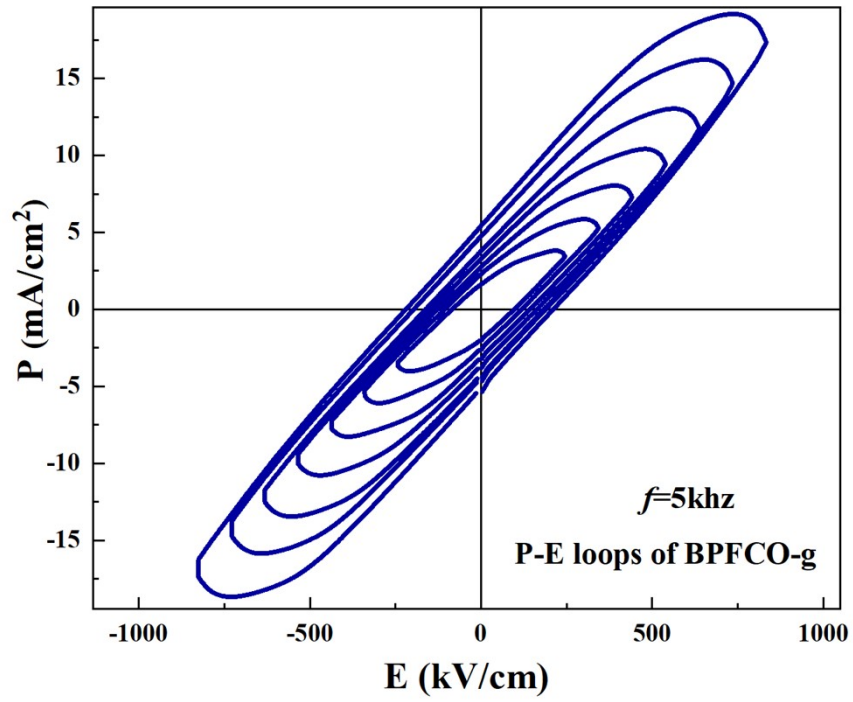

**Figure S7.** Hysteresis loop of gradient doped sample BPF CO-g

**Table S2** Band gap of BPF CO- $x$  ( $x=1,2,3$  g) thin films

|                      | BPF CO-1 | BPF CO-2 | BPF CO-3 |
|----------------------|----------|----------|----------|
| Band gap, $E_g$ (eV) | 2.41     | 2.44     | 2.48     |
